# Supplementary material
Source: HighWire-hosted journal article supplement (https://cmajopen.ca/highwire/filestream/90149/field_highwire_adjunct_files/0/open-2022-0023-1-at.pdf)
Supplement: open-2022-0023-1-at.pdf [file open-2022-0023-1-at.pdf]

# Trends in Antihypertensive Drug Utilization in British Columbia, 2004–2019

## Supplementary File

### Table of Contents

|                                                                                                                                               |    |
|-----------------------------------------------------------------------------------------------------------------------------------------------|----|
| <i>Supplementary Tables</i> .....                                                                                                             | 2  |
| Table S1. List of administrative databases and variables used .....                                                                           | 2  |
| Table S2. List of antihypertensive medications dispensed in British Columbia. ....                                                            | 3  |
| Table S3. List of diagnosis and procedure codes used to identify conditions .....                                                             | 6  |
| Table S4. Covariate definitions .....                                                                                                         | 8  |
| Table S5. Patient flow .....                                                                                                                  | 9  |
| Table S6. Discontinuation of any antihypertensive therapy in the incident user cohort by<br>PharmaCare coverage .....                         | 10 |
| Table S7. Discontinuation of any antihypertensive therapy in the incident user cohort, with<br>discontinuation defined as a 60-day gap .....  | 11 |
| Table S8. Discontinuation of any antihypertensive therapy in the incident user cohort, with<br>discontinuation defined as a 120-day gap ..... | 12 |
| <i>Supplementary Figures</i> .....                                                                                                            | 13 |
| Figure S1. Percentage of incident thiazide users between 2004 and 2019. ....                                                                  | 13 |

## Supplementary Tables

**Table S1. List of administrative databases and variables used**

| Database                                                      | Description                                                                                                                                              | Variables                                                                                                                                                                                                                       |
|---------------------------------------------------------------|----------------------------------------------------------------------------------------------------------------------------------------------------------|---------------------------------------------------------------------------------------------------------------------------------------------------------------------------------------------------------------------------------|
| PharmaNet repository                                          | Records of all prescription drugs and medical supplies dispensed from community pharmacies.                                                              | <ul style="list-style-type: none"> <li>• Drug identification number (DIN)</li> <li>• Generic name</li> <li>• Therapeutic group</li> <li>• Days supply</li> <li>• Service date</li> <li>• Cost accepted by PharmaCare</li> </ul> |
| Medical Services Plan (MSP) Payment Information               | Records of medically necessary physician services provided by fee-for-service practitioners.                                                             | <ul style="list-style-type: none"> <li>• Diagnosis code</li> <li>• Fee item (procedure) code</li> <li>• Service date</li> </ul>                                                                                                 |
| Discharge Abstract Database (DAD)                             | Administrative, clinical, and demographic information on hospital discharges.                                                                            | <ul style="list-style-type: none"> <li>• Diagnosis code</li> <li>• Procedure code</li> <li>• Admission date</li> <li>• Discharge date</li> </ul>                                                                                |
| National Ambulatory Care Reporting System (NACRS)             | Records of hospital-based and community-based ambulatory care, including day surgery, outpatient and community-based clinics, and emergency departments. | <ul style="list-style-type: none"> <li>• Diagnosis code</li> <li>• Procedure code</li> <li>• Registration date</li> </ul>                                                                                                       |
| Medical Services Plan (MSP) Registration and Premium Billings | Records of provincial health plan enrollment and demographics                                                                                            | <ul style="list-style-type: none"> <li>• Birthdate</li> <li>• Sex</li> <li>• Enrollment start date</li> <li>• Enrollment end date</li> <li>• Death</li> </ul>                                                                   |

**Table S2. List of antihypertensive medications dispensed in British Columbia.**

| Therapeutic Group                             | ATC Code                      | Generic Name                   |
|-----------------------------------------------|-------------------------------|--------------------------------|
| Thiazide diuretic                             | C02LA01                       | reserpine/hydrochlorothiazide  |
|                                               | C02LA01                       | hydralazine/reserpin/hcthiazid |
|                                               | C02LB01                       | methyldopa/hydrochlorothiazide |
|                                               | C02LC01                       | clonidine hcl/chlorthalidone   |
|                                               | C03AA03                       | hydrochlorothiazide            |
|                                               | C03BA04                       | chlorthalidone                 |
|                                               | C03BA08                       | metolazone                     |
|                                               | C03BA11                       | indapamide                     |
|                                               | C03EA01                       | spironolact/hydrochlorothiazid |
|                                               | C03EA01                       | amiloride/hydrochlorothiazide  |
|                                               | C03EA01                       | triamterene/hydrochlorothiazid |
|                                               | C07BA05                       | propranolol/hydrochlorothiazid |
|                                               | C07BA06                       | timolol/hydrochlorothiazide    |
|                                               | C07CA03                       | pindolol/hydrochlorothiazide   |
|                                               | C07CB03                       | atenolol/chlorthalidone        |
|                                               | C09BA02                       | enalapril/hydrochlorothiazide  |
|                                               | C09BA03                       | lisinopril/hydrochlorothiazide |
|                                               | C09BA04                       | perindopril arg/indapamide     |
|                                               | C09BA04                       | perindopril erbumin/indapamide |
|                                               | C09BA05                       | ramipril/hydrochlorothiazide   |
|                                               | C09BA06                       | quinapril/hydrochlorothiazide  |
|                                               | C09BA08                       | cilazapril/hydrochlorothiazide |
|                                               | C09DA01                       | losartan/hydrochlorothiazide   |
|                                               | C09DA02                       | eprosartan/hydrochlorothiazide |
|                                               | C09DA03                       | valsartan/hydrochlorothiazide  |
|                                               | C09DA04                       | irbesartan/hydrochlorothiazide |
|                                               | C09DA06                       | candesartan/hydrochlorothiazid |
|                                               | C09DA07                       | telmisartan/hydrochlorothiazid |
|                                               | C09DA08                       | olmesartan/hydrochlorothiazide |
|                                               | C09DA09                       | azilsartan med/chlorthalidone  |
| C09XA52                                       | aliskiren/hydrochlorothiazide |                                |
| Angiotensin-converting enzyme (ACE) inhibitor | C09AA01                       | captopril                      |
|                                               | C09AA02                       | enalapril sodium               |
|                                               | C09AA02                       | enalapril maleate              |
|                                               | C09AA03                       | lisinopril                     |
|                                               | C09AA04                       | perindopril erbumine           |
|                                               | C09AA05                       | ramipril                       |
|                                               | C09AA06                       | quinapril hcl                  |
|                                               | C09AA07                       | benazepril hcl                 |
|                                               | C09AA08                       | cilazapril                     |
|                                               | C09AA09                       | fosinopril sodium              |

|                              |                                                                                                                                                                                                    |                                                                                                                                                                                                                                                                                                                                                                                                                                                                                            |
|------------------------------|----------------------------------------------------------------------------------------------------------------------------------------------------------------------------------------------------|--------------------------------------------------------------------------------------------------------------------------------------------------------------------------------------------------------------------------------------------------------------------------------------------------------------------------------------------------------------------------------------------------------------------------------------------------------------------------------------------|
|                              | C09AA10<br>C09BA02<br>C09BA03<br>C09BA04<br>C09BA04<br>C09BA05<br>C09BA06<br>C09BA08<br>C09BB04<br>C09BB10                                                                                         | trandolapril<br>enalapril/hydrochlorothiazide<br>lisinopril/hydrochlorothiazide<br>perindopril erbumin/indapamide<br>perindopril arg/indapamide<br>ramipril/hydrochlorothiazide<br>quinapril/hydrochlorothiazide<br>cilazapril/hydrochlorothiazide<br>perindopril arg/amlodipine bes<br>trandolapril/verapamil hcl                                                                                                                                                                         |
| Angiotensin receptor blocker | C09CA01<br>C09CA02<br>C09CA03<br>C09CA04<br>C09CA06<br>C09CA07<br>C09CA08<br>C09CA09<br>C09DA01<br>C09DA02<br>C09DA03<br>C09DA04<br>C09DA06<br>C09DA07<br>C09DA08<br>C09DA09<br>C09DB04<br>C09DX04 | losartan potassium<br>eprosartan mesylate<br>valsartan<br>irbesartan<br>candesartan cilexetil<br>telmisartan<br>olmesartan medoxomil<br>azilsartan medoxomil<br>losartan/hydrochlorothiazide<br>eprosartan/hydrochlorothiazide<br>valsartan/hydrochlorothiazide<br>irbesartan/hydrochlorothiazide<br>candesartan/hydrochlorothiazid<br>telmisartan/hydrochlorothiazid<br>olmesartan/hydrochlorothiazide<br>azilsartan med/chlorthalidone<br>telmisartan/amlodipine<br>sacubitril/valsartan |
| Calcium Channel Blocker      | C08CA01<br>C08CA02<br>C08CA05<br>C08CA55<br>C09BB04<br>C09DB04<br>C10BX03                                                                                                                          | amlodipine besylate<br>felodipine<br>nifedipine<br>nifedipine/acetylsalicylic ac<br>perindopril arg/amlodipine bes<br>telmisartan/amlodipine<br>amlodipine/atorvastatin                                                                                                                                                                                                                                                                                                                    |
| Potassium-sparing diuretic   | C03DA01<br>C03DB01<br>C03DB02<br>C03EA01<br>C03EA01<br>C03EA01                                                                                                                                     | spironolactone<br>amiloride hcl<br>triamterene<br>amiloride/hydrochlorothiazide<br>triamterene/hydrochlorothiazid<br>spironolact/hydrochlorothiazid                                                                                                                                                                                                                                                                                                                                        |
| Loop diuretic                | C03CA01<br>C03CA02                                                                                                                                                                                 | furosemide<br>bumetanide                                                                                                                                                                                                                                                                                                                                                                                                                                                                   |
| Beta-blocker                 | C07AA03                                                                                                                                                                                            | pindolol                                                                                                                                                                                                                                                                                                                                                                                                                                                                                   |

|       |         |                                |
|-------|---------|--------------------------------|
|       | C07AA05 | propranolol hcl                |
|       | C07AA06 | timolol maleate                |
|       | C07AA12 | nadolol                        |
|       | C07AB02 | metoprolol tartrate            |
|       | C07AB03 | atenolol                       |
|       | C07AB07 | bisoprolol fumarate            |
|       | C07AB12 | nebivolol hcl                  |
|       | C07AG01 | labetalol hcl                  |
|       | C07BA05 | propranolol/hydrochlorothiazid |
|       | C07BA06 | timolol/hydrochlorothiazide    |
|       | C07BA12 | nadolol/bendroflumethiazide    |
|       | C07CA03 | pindolol/hydrochlorothiazide   |
|       | C07CB03 | atenolol/chlorthalidone        |
| Other | C02AA02 | reserpine                      |
|       | C02AB02 | methyldopa                     |
|       | C02AC01 | clonidine hcl                  |
|       | C02AC02 | guanfacine hcl                 |
|       | C02CA01 | prazosin hcl                   |
|       | C02CA04 | doxazosin mesylate             |
|       | C02DB02 | hydralazine hcl                |
|       | C02DC01 | minoxidil                      |
|       | C02LA01 | reserpine/hydrochlorothiazide  |
|       | C02LA01 | hydralazine/reserpin/hcthiazid |
|       | C02LB01 | methyldopa/hydrochlorothiazide |
|       | C02LB01 | methyldopa/chlorothiazide      |
|       | C02LC01 | clonidine hcl/chlorthalidone   |
|       | C03DA01 | spironolactone                 |
|       | C08DA01 | verapamil hcl                  |
|       | C08DB01 | diltiazem hcl                  |
|       | C09BB10 | trandolapril/verapamil hcl     |
|       | C09XA02 | aliskiren fumarate             |
|       | C09XA52 | aliskiren/hydrochlorothiazide  |
|       | G04CA03 | terazosin hcl                  |
|       | N02CX02 | clonidine hcl                  |

*ATC Anatomical Therapeutic Chemical.*

**Table S3. List of diagnosis and procedure codes used to identify conditions**

| Condition                                                | Diagnosis Codes                                            |                                                                                                                                                                                          | Procedure Codes                                                      |                                                                                                                                                |                                                                     |
|----------------------------------------------------------|------------------------------------------------------------|------------------------------------------------------------------------------------------------------------------------------------------------------------------------------------------|----------------------------------------------------------------------|------------------------------------------------------------------------------------------------------------------------------------------------|---------------------------------------------------------------------|
|                                                          | ICD-9                                                      | ICD-10                                                                                                                                                                                   | CCP                                                                  | CCI                                                                                                                                            | MSP fee Items*                                                      |
| Cancer                                                   | 140-209, V58.0, V58.1                                      | C00-C97, Z51.0, Z51.1, Z51.2                                                                                                                                                             | 06.2 (radiotherapy),<br>06.3 (radiotherapy),<br>13.55 (chemotherapy) | X.XX.35.XX-G6<br>(chemotherapy),<br>X.XX.35.XX-M0 to<br>X.XX.35.XX-M9<br>(chemotherapy), X.XX.27<br>(radiotherapy), X.XX.26<br>(brachytherapy) | 33581, 33582, 33583<br>(chemotherapy)                               |
| Renal failure                                            | 584-586                                                    | N17-N19                                                                                                                                                                                  | -                                                                    | -                                                                                                                                              | -                                                                   |
| Dialysis<br>(peritoneal or<br>hemodialysis)              | V45.1, V56.0, V56.8,<br>E870.2, E871.2,<br>E872.2, E874.2  | E10.220-E10.224,<br>E10.229, E11.220-<br>E11.224, E11.229,<br>E13.220-E13.224,<br>E13.229, E14.220-<br>E14.224, E14.229,<br>T82.4, Y60.2, Y61.2,<br>Y62.2, Y84.1, Z49.0-<br>Z49.2, Z99.2 | 51.27, 51.42, 51.43,<br>51.95, 66.98                                 | 1PZ21HPD4,<br>1PZ21HQBR,<br>1PZ21HQBS                                                                                                          | 33750, 33751, 33752,<br>33708, 33756, 33758,<br>33723, 33759, 33761 |
| Diseases<br>associated with<br>secondary<br>hypertension | 194.0, 227.0, 237.3,<br>255.1, 255.6, 405,<br>447.3, 447.8 | C74.1, C75.5, D13.2,<br>D35.0, D44.6, D44.7,<br>E26, E27.5, I15, I77.3,                                                                                                                  | -                                                                    | -                                                                                                                                              | -                                                                   |
| Congestive heart<br>failure                              | 428                                                        | I50                                                                                                                                                                                      | -                                                                    | -                                                                                                                                              | -                                                                   |
| Coronary artery<br>disease                               | 410.x-414.x                                                | I20.x-I25.x                                                                                                                                                                              | 48.0, 48.1, 48.2                                                     | 1.IJ.76, 1.IJ.50                                                                                                                               | 07908, 0790, 07990,<br>00839, 00840, 00842,<br>00841                |
| Cirrhosis and<br>liver disease                           | 570-573                                                    | K70-K75                                                                                                                                                                                  | -                                                                    | -                                                                                                                                              | -                                                                   |
| Toxemia of<br>pregnancy                                  | 642.5-642.7                                                | O11, O14-O15                                                                                                                                                                             | -                                                                    | -                                                                                                                                              | -                                                                   |

| Condition                      | Diagnosis Codes  |                                          | Procedure Codes                             |                                    |                |
|--------------------------------|------------------|------------------------------------------|---------------------------------------------|------------------------------------|----------------|
|                                | ICD-9            | ICD-10                                   | CCP                                         | CCI                                | MSP fee Items* |
| Premenstrual tension and edema | 625.4            | N94.3                                    | -                                           | -                                  | -              |
| Nephrotic syndrome             | 581              | N04                                      | -                                           | -                                  | -              |
| Kidney stones                  | 593-594          | N20-N23                                  | 68.0, 68.2, 67.01, 69.0, 69.13, 70.5, 71.96 | 1.PG.59, 1.PE.59, 1.PL.59, 1.PM.59 |                |
| Hypercalcemia                  | 275.42           | E83.52                                   | -                                           | -                                  | -              |
| Diabetes Insipidus             | 253.5, 588.1     | E23.2, N25.1                             | -                                           | -                                  | -              |
| Migraine                       | 346              | G43                                      | -                                           | -                                  | -              |
| Diabetic nephropathy           | 249.4, 250.4     | E10.2, E10.7, E11.2, E11.7, E14.2, E14.7 | -                                           | -                                  | -              |
| Other chronic kidney diseases  | 580-589, 590-593 | N00-N20, N25-N29                         | -                                           | -                                  | -              |
| Marfan syndrome                | 759.82           | Q87.4                                    | -                                           | -                                  | -              |

*ICD* International Classification of Disease; *CCP* Canadian Classification of Diagnostic, Therapeutic, and Surgical Procedures; *CCI* Canadian Classification of Health Interventions; *MSP* Medical Services Plan.

\* List of MSP fee items are available from <https://www2.gov.bc.ca/assets/gov/health/practitioner-pro/medical-services-plan/msc-payment-schedule-may-2021.pdf>.

**Table S4. Covariate definitions**

| <b>Covariate</b>    | <b>Definition</b>                                                                                                                                                          |
|---------------------|----------------------------------------------------------------------------------------------------------------------------------------------------------------------------|
| Age                 | Age at initiation of antihypertensive therapy [discrete]                                                                                                                   |
| Sex                 | Based on provincial health insurance registry data [female; male]                                                                                                          |
| Income level        | Any prescription drug claim paid by an assisted basic or senior \$0 deductible plan or social services plan in the 1 year before cohort entry.<br>[assisted; not assisted] |
| PharmaCare coverage | Total accepted amount by PharmaCare > \$0 for the initial antihypertensive drug class<br>[covered; not covered]                                                            |
| Geographical area   | Based on forward sortation area of individuals' residence in British Columbia<br>[north; east; central; west-rural; west-urban]                                            |



**Table S5. Patient flow**

|                                                                                                                      | <b>No. of individuals remaining</b> | <b>No. of individuals excluded</b> | <b>% excluded</b> |
|----------------------------------------------------------------------------------------------------------------------|-------------------------------------|------------------------------------|-------------------|
| <b>Source population</b>                                                                                             | 5,669,128                           |                                    |                   |
| Individuals with a new prescription for a thiazide, ACEI, ARB, or CCB between January 1, 2004 and December 31, 2014. | 502,743                             |                                    |                   |
| <b>Exclusion criteria</b>                                                                                            |                                     |                                    |                   |
| Lack of continuous enrollment in the 2 years before cohort entry                                                     | 430,415                             | 72,328                             | 14.4              |
| Lost MSP enrollment within the first 3 months of the initial prescription                                            | 429,697                             | 718                                | 0.1               |
| Missing information on age or sex                                                                                    | 429,677                             | 20                                 | 0.0               |
| Age under 30 or over 75 on date of the initial prescription                                                          | 373,364                             | 56,313                             | 11.2              |
| Died before cohort entry                                                                                             | 373,347                             | 17                                 | 0.0               |
| Dispensed both ACEI and ARB on date of the initial prescription                                                      | 373,301                             | 46                                 | 0.0               |
| Cancer                                                                                                               | 303,741                             | 69,560                             | 13.8              |
| Renal failure or dialysis                                                                                            | 298,430                             | 5,311                              | 1.1               |
| Secondary hypertension                                                                                               | 297,622                             | 808                                | 0.2               |
| Heart failure                                                                                                        | 291,821                             | 5,801                              | 1.2               |
| Coronary artery disease                                                                                              | 264,202                             | 27,619                             | 5.5               |
| Edema-causing conditions (except steroid use)                                                                        | 261,098                             | 3,104                              | 0.6               |
| Steroid use                                                                                                          | 255,881                             | 5,217                              | 1.0               |
| Kidney stones or hypercalcemia                                                                                       | 254,400                             | 1,481                              | 0.3               |
| Diabetes Insipidus                                                                                                   | 254,380                             | 20                                 | 0.0               |
| Migraine                                                                                                             | 250,854                             | 3,526                              | 0.7               |
| Diabetic nephropathy                                                                                                 | 250,641                             | 213                                | 0.0               |
| Other chronic kidney diseases                                                                                        | 248,539                             | 2,102                              | 0.4               |
| Marfan syndrome                                                                                                      | 248,533                             | 6                                  | 0.0               |
| Discontinued any antihypertensive therapy within the first 3 months of the initial prescription                      | 232,781                             | 15,752                             | 3.1               |
| <b>Final Cohort</b>                                                                                                  | <b>232,781</b>                      |                                    |                   |

**Table S6. Discontinuation of any antihypertensive therapy in the incident user cohort by PharmaCare coverage**

| <b>With PharmaCare Coverage</b>       |                           |                   |                       |                           |                               |
|---------------------------------------|---------------------------|-------------------|-----------------------|---------------------------|-------------------------------|
| <b>Initial Drug Class</b>             | <b>Discontinued n (%)</b> | <b>Died n (%)</b> | <b>Censored n (%)</b> | <b>Crude SHR (95% CI)</b> | <b>Adjusted SHR (95% CI)*</b> |
| Thiazide Monotherapy<br>n = 84,897    | 54,972 (64.7)             | 987 (1.2)         | 28938 (34.1)          | Reference                 | Reference                     |
| ACEI Monotherapy<br>n = 98,157        | 59,881 (61.0)             | 1324 (1.3)        | 36952 (37.6)          | 0.95 (0.94-0.96)          | 0.94 (0.93-0.96)              |
| ARB Monotherapy<br>n = 1002           | 635 (63.4)                | 18 (1.8)          | 349 (34.8)            | 0.98 (0.90-1.06)          | 0.99 (0.91-1.07)              |
| Thiazide with ACEI/ARB<br>n = 10,957  | 6560 (59.8)               | 173 (1.6)         | 4224 (38.6)           | 0.92 (0.90-0.94)          | 0.92 (0.90-0.94)              |
| Calcium Channel Blocker<br>n = 14,510 | 9198 (63.4)               | 189 (1.3)         | 5123 (35.3)           | 1.06 (1.03-1.08)          | 1.04 (1.01-1.06)              |
| <b>Without PharmaCare Coverage</b>    |                           |                   |                       |                           |                               |
| <b>Initial Drug Class</b>             | <b>Discontinued n (%)</b> | <b>Died n (%)</b> | <b>Censored n (%)</b> | <b>Crude SHR (95% CI)</b> | <b>Adjusted SHR (95% CI)*</b> |
| Thiazide Monotherapy<br>n = 1111      | 756 (68.0)                | 12 (1.1)          | 343 (30.9)            | Reference                 | Reference                     |
| ACEI Monotherapy<br>n = 2513          | 1957 (77.9)               | 13 (0.5)          | 543 (21.6)            | 1.50 (1.37-1.63)          | 1.48 (1.36-1.62)              |
| ARB Monotherapy<br>n = 10,447         | 6788 (65.0)               | 77 (0.7)          | 3582 (34.3)           | 0.91 (0.84-0.98)          | 0.92 (0.86-0.99)              |
| Thiazide with ACEI/ARB<br>n = 7952    | 4965 (62.4)               | 70 (0.9)          | 2917 (36.7)           | 0.86 (0.80-0.93)          | 0.89 (0.82-0.96)              |
| Calcium Channel Blocker<br>n = 1235   | 887 (71.8)                | 9 (0.7)           | 339 (27.4)            | 1.24 (1.12-1.36)          | 1.22 (1.11-1.35)              |

SHR Subdistribution hazard ratio; CI confidence interval; ACEI Angiotensin-converting enzyme inhibitor; ARB angiotensin II receptor blocker.

\* Adjusted for age, sex, income level, PharmaCare coverage, geographical area.

**Table S7. Discontinuation of any antihypertensive therapy in the incident user cohort, with discontinuation defined as a 60-day gap.**

| Initial Drug Class                   | Discontinued n (%) | Died n (%) | Censored n (%) | Crude SHR (95% CI) | Adjusted SHR (95% CI)* |
|--------------------------------------|--------------------|------------|----------------|--------------------|------------------------|
| Thiazide Monotherapy<br>n = 85,909   | 62,633 (72.9)      | 831 (1.0)  | 22445 (26.1)   | Reference          | Reference              |
| ACEI Monotherapy<br>n = 100,526      | 70,496 (70.1)      | 1105 (1.1) | 28,925 (28.8)  | 0.98 (0.97-0.99)   | 0.97 (0.96-0.98)       |
| ARB Monotherapy<br>n = 11,430        | 8421 (73.7)        | 77 (0.7)   | 2932 (25.7)    | 1.10 (1.07-1.13)   | 0.90 (0.87-0.93)       |
| Thiazide with ACEI/ARB<br>n = 18,882 | 13,241 (70.1)      | 200 (1.1)  | 5441 (28.8)    | 0.99 (0.97-1.01)   | 0.91 (0.89-0.93)       |
| CCB<br>n = 15,728                    | 11,156 (70.9)      | 171 (1.1)  | 4401 (28.0)    | 1.04 (1.02-1.07)   | 1.01 (0.99-1.03)       |

*SHR* Subdistribution hazard ratio; *CI* confidence interval; *ACEI* angiotensin-converting enzyme inhibitor; *ARB* angiotensin II receptor blocker; *CCB* calcium channel blocker.

\* Adjusted for age, sex, income level, PharmaCare coverage, geographical area.

**Table S8. Discontinuation of any antihypertensive therapy in the incident user cohort, with discontinuation defined as a 120-day gap.**

| Initial Drug Class                   | Discontinued n (%) | Died n (%) | Censored n (%) | Crude SHR (95% CI) | Adjusted SHR (95% CI)* |
|--------------------------------------|--------------------|------------|----------------|--------------------|------------------------|
| Thiazide Monotherapy<br>n = 86,008   | 51,051 (59.4)      | 1089 (1.3) | 33,868 (39.4)  | Reference          | Reference              |
| ACEI Monotherapy<br>n = 100,670      | 56,044 (55.7)      | 1484 (1.5) | 43,142 (42.9)  | 0.95 (0.94-0.96)   | 0.95 (0.94-0.96)       |
| ARB Monotherapy<br>n = 11,449        | 6685 (58.4)        | 102 (0.9)  | 4662 (40.7)    | 1.03 (1.01-1.06)   | 0.78 (0.75-0.81)       |
| Thiazide with ACEI/ARB<br>n = 18,909 | 10,411 (55.1)      | 266 (1.4)  | 8232 (43.5)    | 0.94 (0.92-0.96)   | 0.83 (0.81-0.85)       |
| CCB<br>n = 15,745                    | 9314 (59.2)        | 215 (1.4)  | 6216 (39.5)    | 1.10 (1.08-1.13)   | 1.06 (1.04-1.09)       |

*SHR* Subhazard ratio; *CI* confidence interval; *ACEI* angiotensin-converting enzyme inhibitor; *ARB* angiotensin II receptor blocker; *CCB* calcium channel blocker.

\* Adjusted for age, sex, income level, PharmaCare coverage, geographical area.

## Supplementary Figures

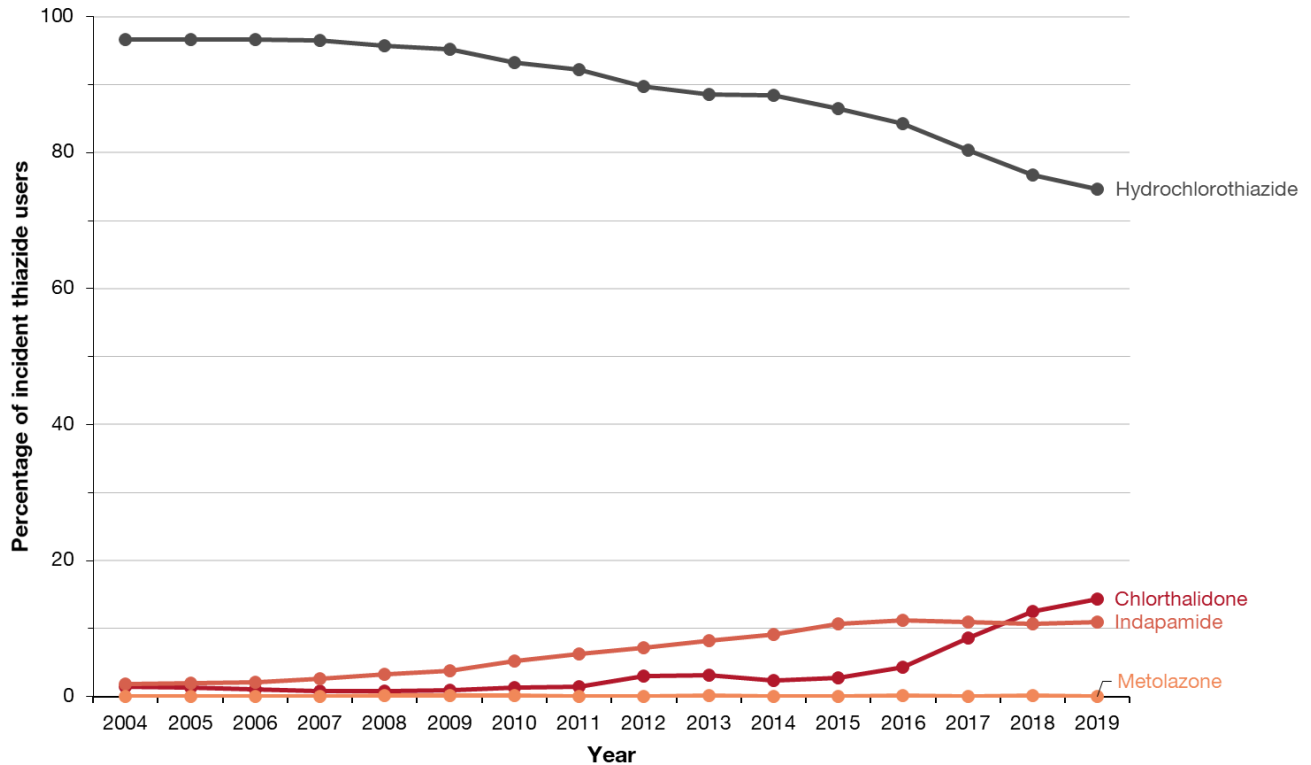

**Figure S1. Percentage of incident thiazide users between 2004 and 2019.**
